# Supplementary material
Source: HighWire-hosted journal article supplement (https://jitc.bmj.com/content/8/1/e000258)
Supplement: inline-supplementary-material-4 [file inline-supplementary-material-4.pdf]

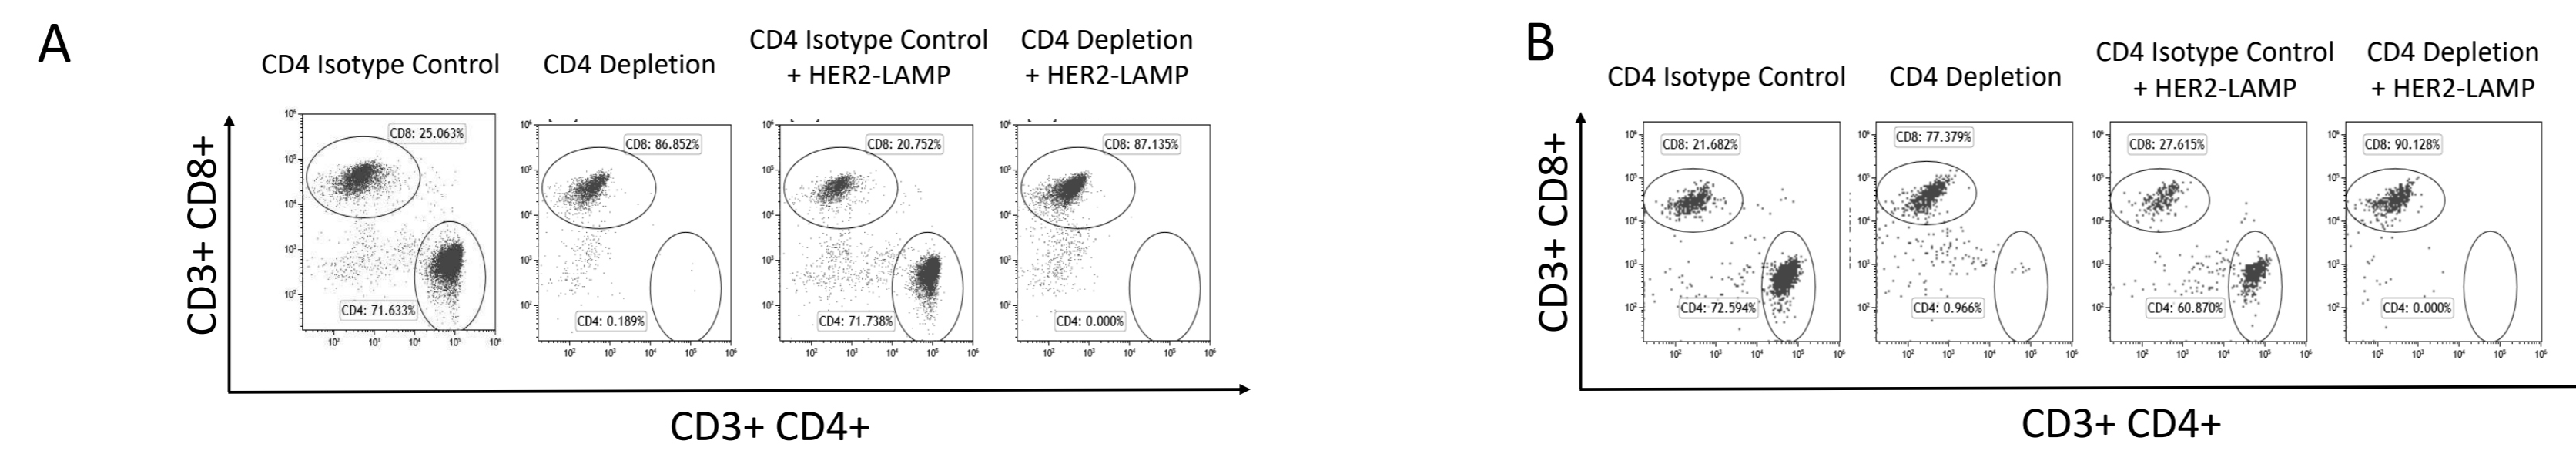

**Figure S4. Detection of CD4 depletion in the peripheral blood of TSA-HER2 implanted mice.** A) CD4 staining of the peripheral blood of the mice used in the induction model 1 day before tumor implantation.  $n=7$  B) CD4 staining of the peripheral blood of the mice used in the induction model 7 days after tumor implantation.
