# Supplementary material
Source: HighWire-hosted journal article supplement (https://jitc.bmj.com/content/8/1/e000258)
Supplement: inline-supplementary-material-7 [file inline-supplementary-material-7.pdf]

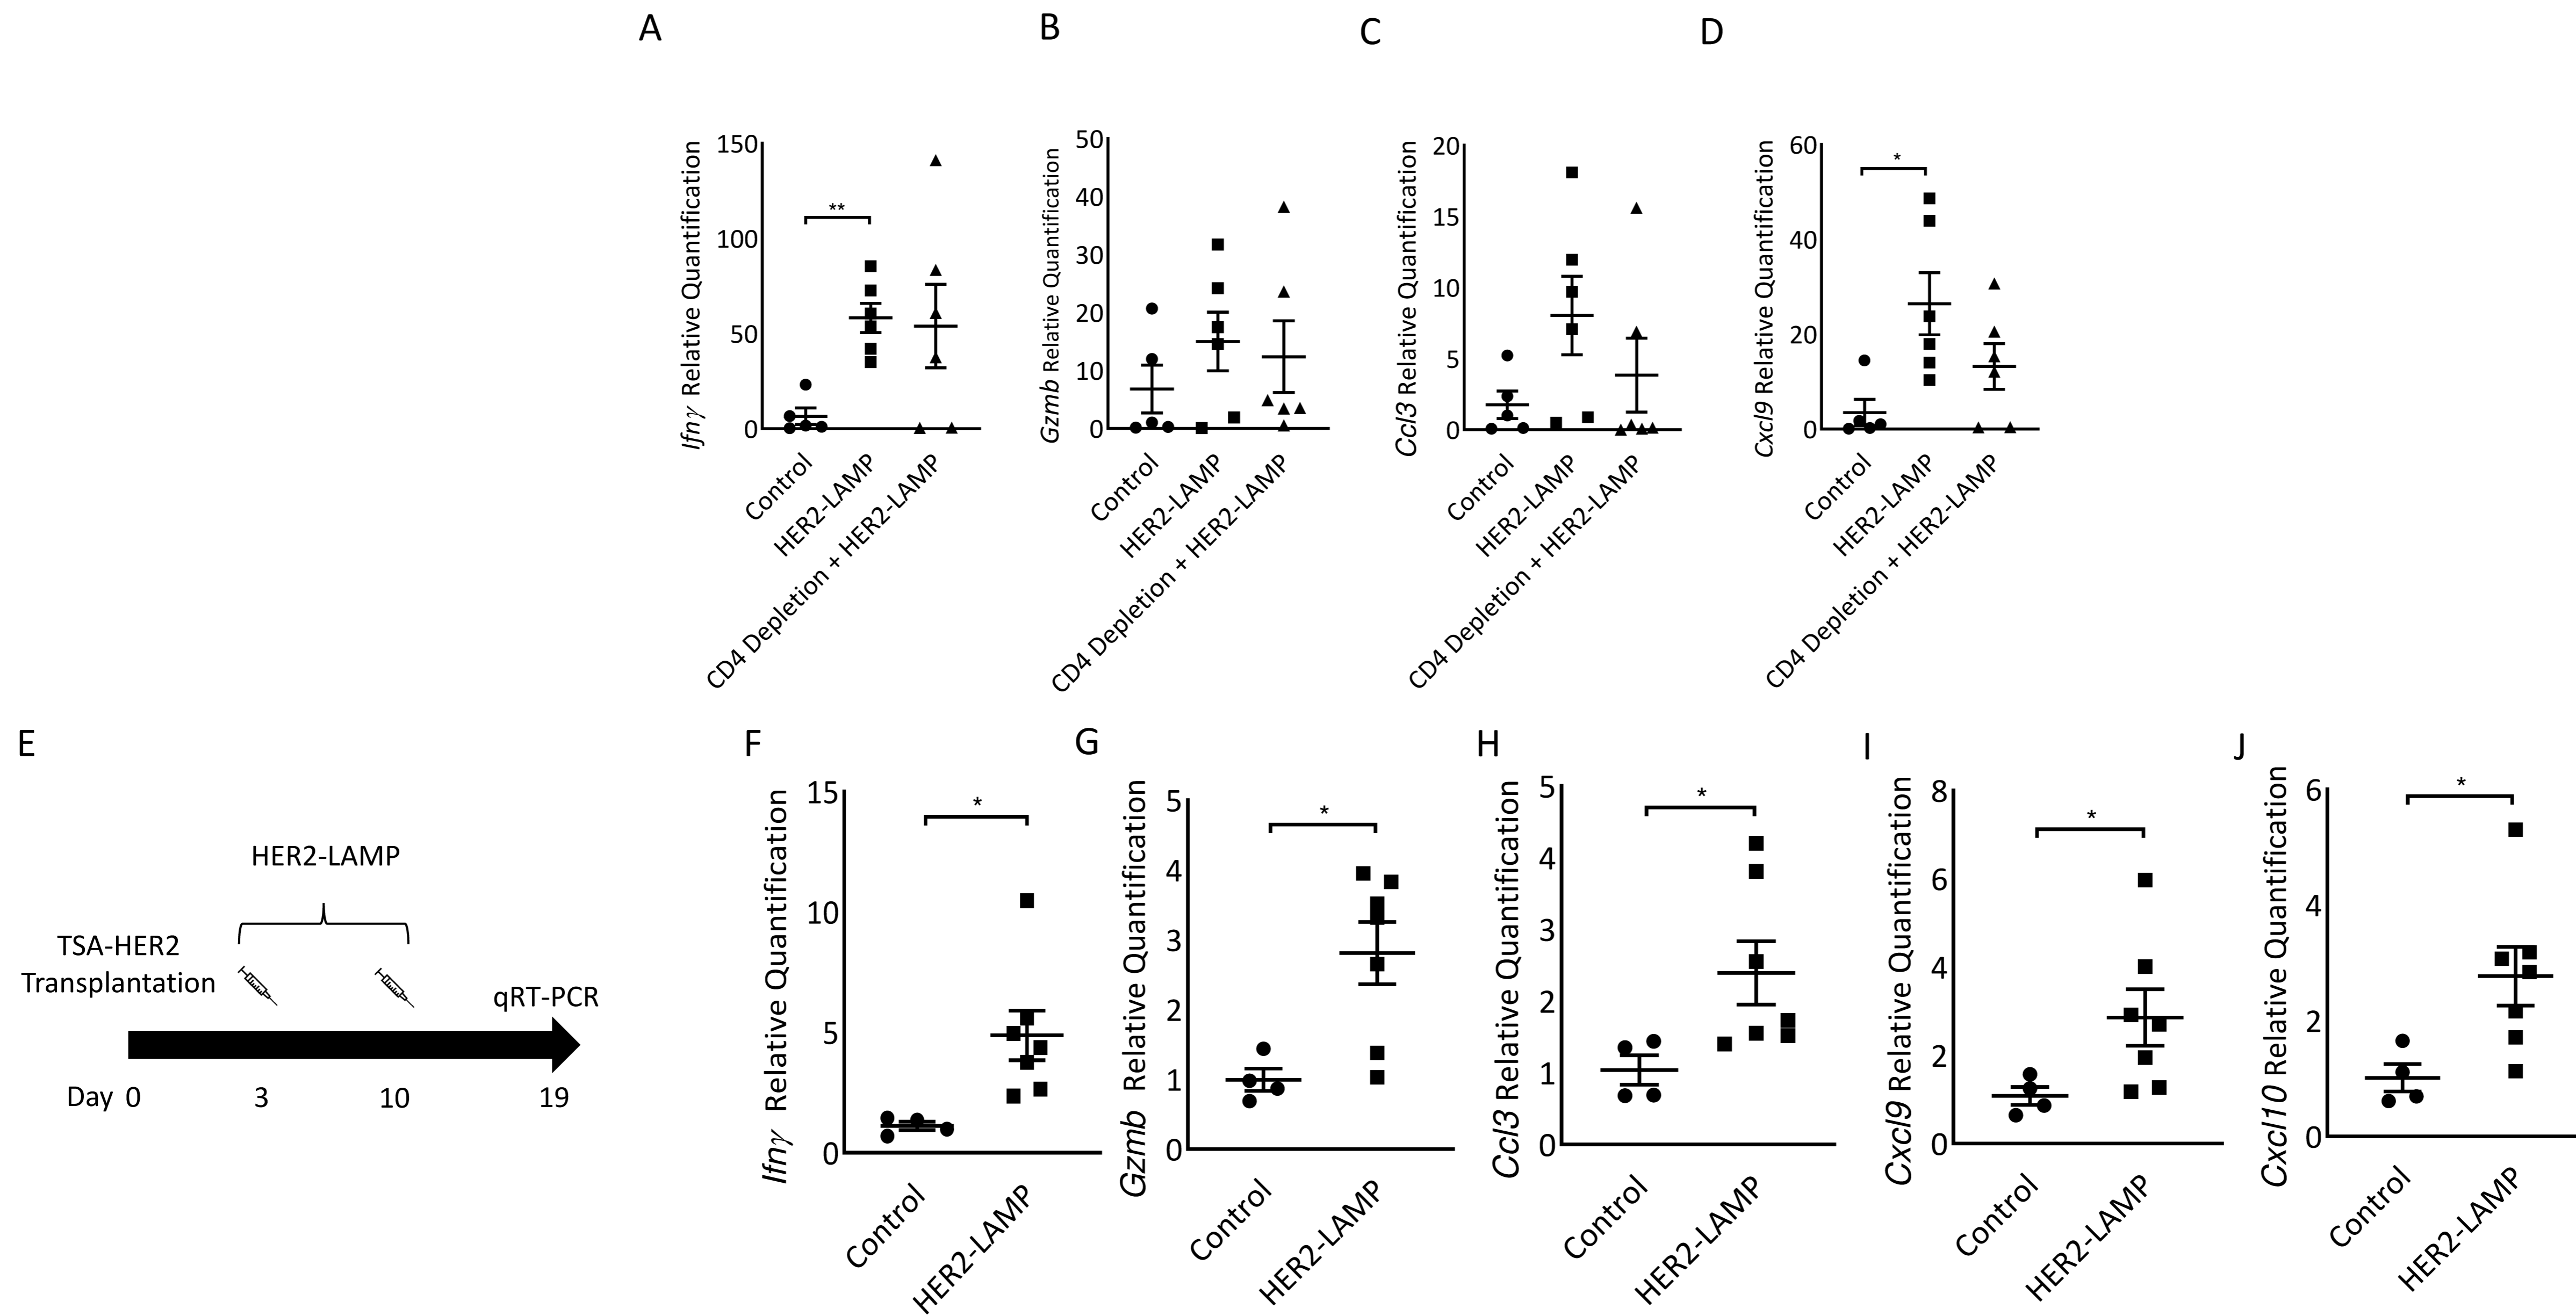

**Figure S7. qRT-PCR Detection of Cytokines in Tumors.**

The expression of *Ifng* (A)  $n=6$ , *Gzmb* (B)  $n=6$ , *Ccl3* (C)  $n=6$ , and *Cxcl9* (D)  $n=6$  in the tumors of HER2-LAMP vaccinated mice used in the induction model shown in Fig 4F. E) BALB/c mice were implanted with 300,00 TSA-HER2 cells into the mammary fat pad. Intradermal electroporation was administered using 40 $\mu$ g control vector  $n=4$  or 40 $\mu$ g HER2-LAMP  $n=7$  with two immunizations administered at 3 and 10 days after transplantation. qRT-PCR analysis on TILS were performed 9 days after the last vaccination. The expression of *Ifng* (F), *Gzmb* (G), *Ccl3* (H), *Cxcl9* (I), and *Cxcl10* (J) in the tumors of HER2-LAMP vaccinated mice used in the model similar to the one shown in Fig 4A.
