# Supplementary material
Source: HighWire-hosted journal article supplement (https://jitc.bmj.com/content/8/1/e000258)
Supplement: inline-supplementary-material-8 [file inline-supplementary-material-8.pdf]

## HER2-LAMP vaccines effectively traffic to endolysosomal compartments and generate enhanced polyfunctional T cell responses that induce complete tumor regression

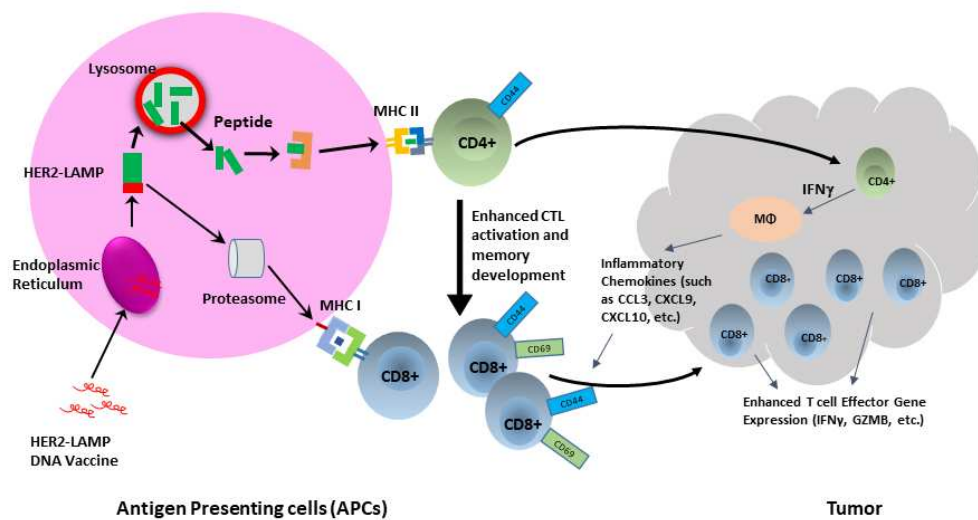

### Authors

Alan Chen\*, Renhuan Xu\*, Tao Wang, Junping Wei, Xiao Yang, Cong-Xiao Liu, Gangjun Lei, Herbert Kim Lyerly, Teri Heiland, Zachary C. Hartman

### Correspondence

[Zachary.Hartman@duke.edu](mailto:Zachary.Hartman@duke.edu)

### In Brief

HER2 cancer vaccines incorporating LAMP domains allow for enhanced antigen trafficking to the endolysosomal complex, resulting in augmented MHC class I and II presentation, increased stimulation of CD4+ and CD8+ antigen-specific T-cell responses, and higher numbers of polyfunctional T cells that results in augmented T cell trafficking into the tumor microenvironment and significantly improved anti-tumor immunity.
